# Supplementary material
Source: PubMed Central journal article supplement (PMC4970887)
Supplement: NIHMS794897-supplement-2.pdf [file NIHMS794897-supplement-2.pdf]

## **Acute sensitivity of Ph-like acute lymphoblastic leukemia to the SMAC-mimetic birinapant**

Jennifer Richmond<sup>1</sup>, Alissa Robbins<sup>1</sup>, Kathryn Evans<sup>1</sup>, Dominik Beck<sup>2</sup>, Raushan T. Kurmasheva<sup>3</sup>, Catherine A. Billups<sup>4</sup>, Hernan Carol<sup>1</sup>, Sue Heatley<sup>5</sup>, Rosemary Sutton<sup>1</sup>, Glenn M. Marshall<sup>6</sup>, Deborah White<sup>5</sup>, John Pimanda<sup>2</sup>, Peter J. Houghton<sup>3</sup>, Malcolm A. Smith<sup>7</sup>, and Richard B. Lock<sup>1</sup>

<sup>1</sup>Children's Cancer Institute, Lowy Cancer Research Centre, UNSW Australia, Sydney, Australia

<sup>2</sup>Lowy Cancer Research Centre, UNSW Australia, Sydney, Australia

<sup>3</sup>Greehey Children's Cancer Research Institute, University of Texas Health Science Center San Antonio, San Antonio, Texas

<sup>4</sup>Department of Pathology, St. Jude Children's Research Hospital, Memphis, Tennessee

<sup>5</sup>South Australia Health and Medical Research Institute, Adelaide, South Australia, Australia

<sup>6</sup>Kids Cancer Centre, Sydney Children's Hospital, Randwick, Australia

<sup>7</sup>Cancer Therapy Evaluation Program, NCI, Bethesda, Maryland

## **SUPPLEMENTAL FIGURES AND TABLES**

# Supplemental Figures

## Supplemental Figure S1

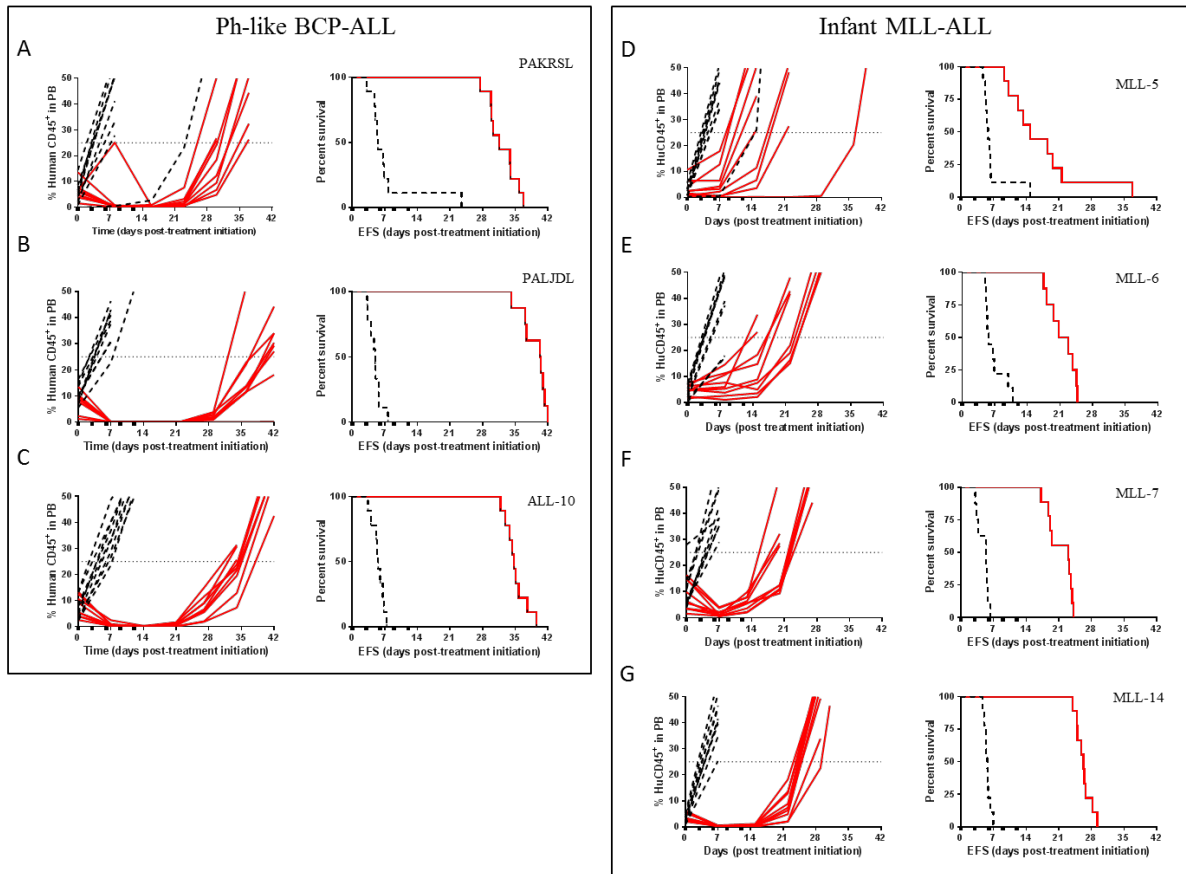

# Supplemental Figure S2

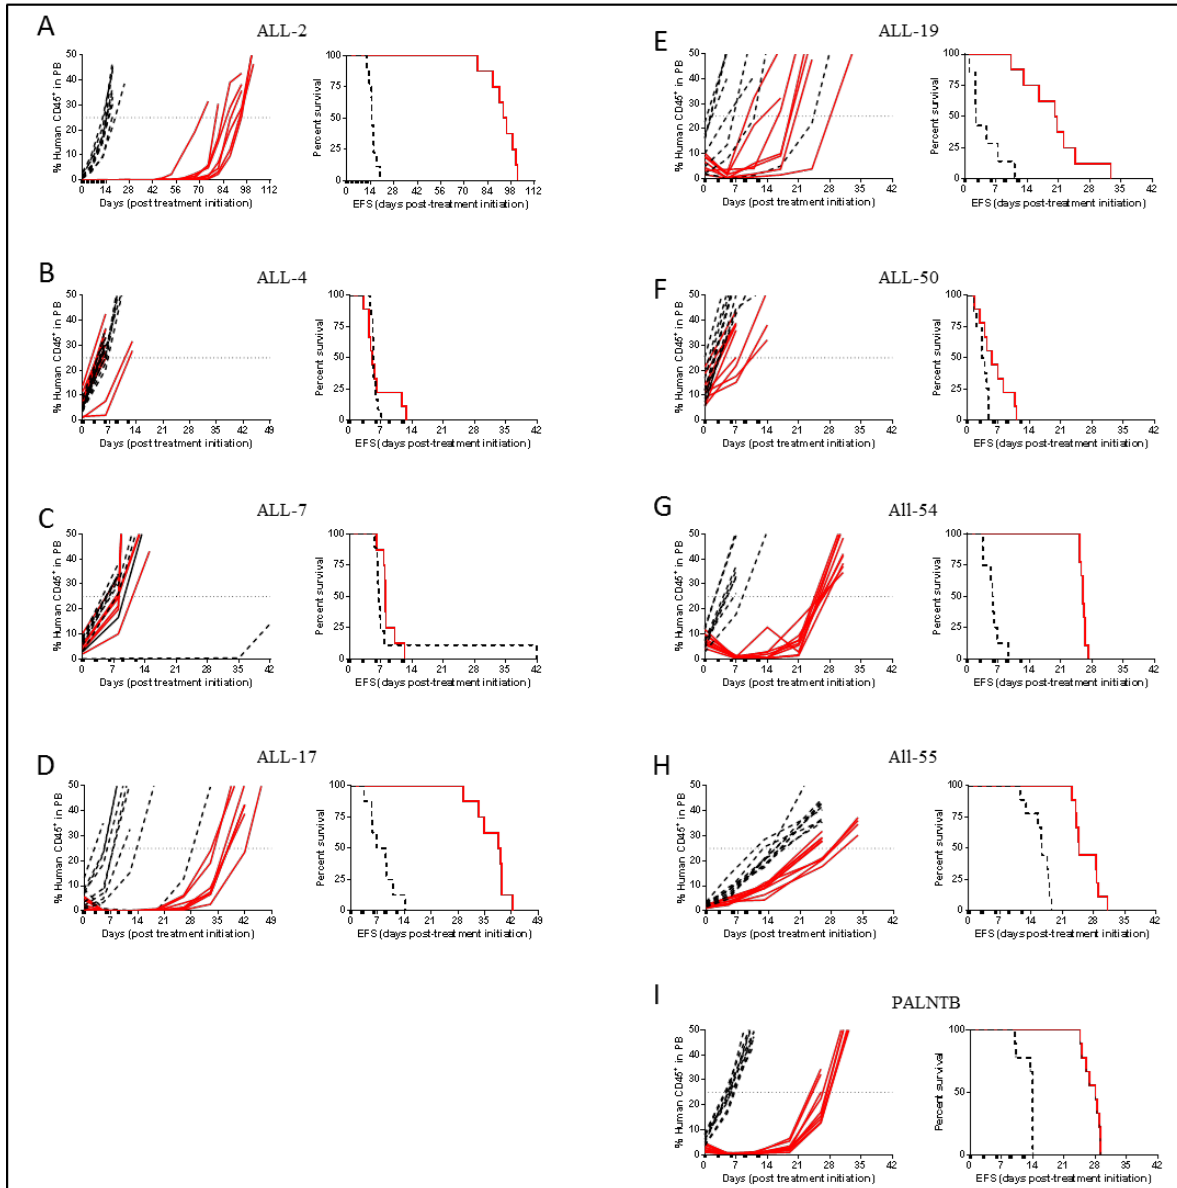

# Supplemental Figure S3

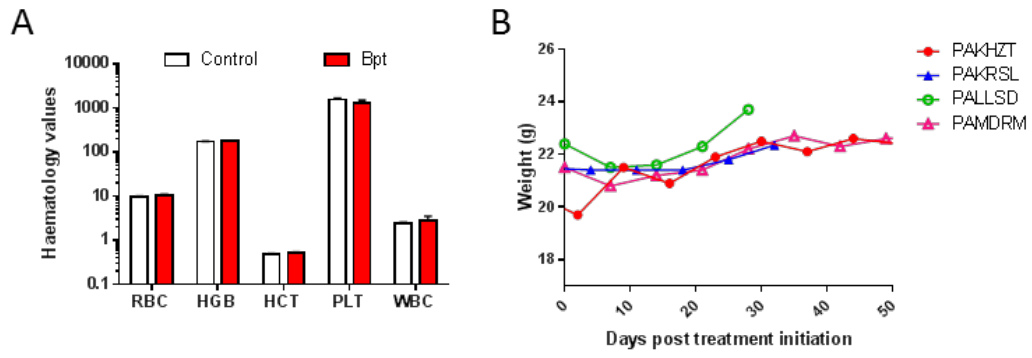

# Supplemental Figure S4

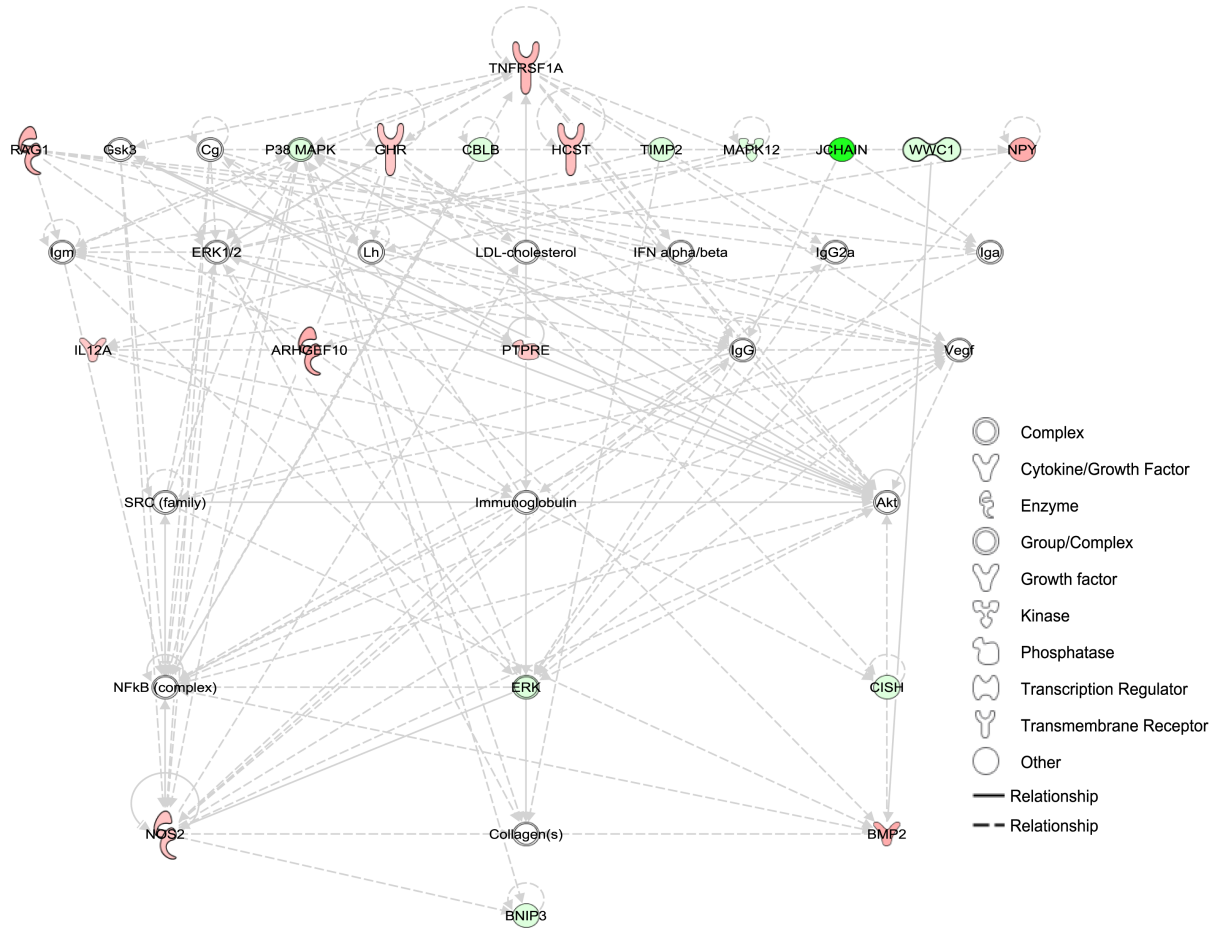

## Supplementary Tables

**Table S1. Patient demographics of primary patient samples and PDXs**

| Patient sample/PDX | Age (y) | Sex | Lineage | Disease Status at Biopsy | Cytogenetics                                                | Specific Kinase Lesions                                | CRLF2 Expression <sup>1</sup> | CRLF2 Rearrangement <sup>2</sup> | Ph-like <sup>3</sup> |
|--------------------|---------|-----|---------|--------------------------|-------------------------------------------------------------|--------------------------------------------------------|-------------------------------|----------------------------------|----------------------|
| #102d              | 3.1     | M   | BCP-ALL | Diagnosis                | 47, XY, +X[14]/46, XY[9]                                    | JAK2 T875N                                             | High                          | <i>P2RY8-CRLF2</i>               | Y                    |
| #102r              | 5.3     | M   | BCP-ALL | Relapse                  | Not available                                               | JAK2 T875N                                             | High                          | <i>P2RY8-CRLF2</i>               | Y                    |
| #103               | 16.7    | F   | BCP-ALL | Diagnosis                | 50,XX,+X,+13,+17,+22[4]/46,XX[11]                           | Not detected                                           | High                          | <i>P2RY8-CRLF2</i>               | Y                    |
| #106               | 14.9    | M   | BCP-ALL | Diagnosis                | 46,XY                                                       | <i>EBF1-PDGFRB</i>                                     | Normal                        | None                             | Y                    |
| #107               | 5.5     | M   | BCP-ALL | Diagnosis                | 47,XY,+X[14]/46,XY[6]                                       | JAK2 R683S                                             | High                          | <i>P2RY8-CRLF2</i>               | Y                    |
| #108               | 6.2     | F   | BCP-ALL | Diagnosis                | 46,XX,dic(9;20)(p13;q11.2),del(11)(q13q22),+21[12]/46,XX[8] | Not detected                                           | High                          | <i>P2RY8-CRLF2</i>               | Y                    |
| #109               | 66      | M   | BCP-ALL | Diagnosis                | Trisomy Chr 5&13                                            | FLT3 V579A                                             | High                          | <i>IGH@-CRLF2</i>                | Y                    |
| #110               | 37      | F   | BCP-ALL | Diagnosis                | t(9;22)                                                     | <i>BCR-ABL1</i>                                        | Normal                        | None                             | N                    |
| #111               | 28      | M   | BCP-ALL | Diagnosis                | add(9)(p24)                                                 | <i>ATF7IP-JAK2</i>                                     | Normal                        | None                             | Y                    |
| #112               | 18      | M   | BCP-ALL | Diagnosis                | Not available                                               | Not detected                                           | Normal                        | None                             | N                    |
| #113               | 16      | M   | BCP-ALL | Diagnosis                | Normal                                                      | Not detected                                           | Normal                        | None                             | N                    |
| #114               | 81      | M   | BCP-ALL | Diagnosis                | TEL-ABL                                                     | <i>ETV6-ABL1</i>                                       | Normal                        | None                             | Y                    |
| ALL-10             | 4       | M   | BCP-ALL | Diagnosis                | 47,XY,+mar                                                  | JAK1 V658L                                             | High                          | Not done                         | Y                    |
| PAKHZT             | 13.9    | M   | BCP-ALL | Diagnosis                | Not available                                               | JAK2 R867Q                                             | High                          | <i>IGH@-CRLF2</i>                | Y                    |
| PAKRSL             | 13.7    | F   | BCP-ALL | Diagnosis                | Not available                                               | JAK2 R683G                                             | High                          | <i>IGH@-CRLF2</i>                | Y                    |
| PAKSWW             | 15.1    | M   | BCP-ALL | Diagnosis                | Not available                                               | JAK1 V658F                                             | High                          | <i>IGH@-CRLF2</i>                | Y                    |
| PALJCF             | 3.5     | F   | BCP-ALL | Diagnosis                | Not available                                               | JAK1 L624_R629>W                                       | High                          | <i>P2RY8-CRLF2</i>               | Y                    |
| PALNTB             | 8.7     | F   | BCP-ALL | Diagnosis                | Not available                                               | JAK2 P933R                                             | High                          | <i>IGH@-CRLF2</i>                | N                    |
| PAMDRM             | 7.9     | M   | BCP-ALL | Diagnosis                | Not available                                               | JAK2 GPins1682                                         | High                          | <i>IGH@-CRLF2</i>                | Y                    |
| PALJDL             | 3.2     | M   | BCP-ALL | Diagnosis                | Not available                                               | IL7R p.L242_L243insFPGVC mutation; SH2B3 e1-2 deletion | Normal                        | Not done                         | Y                    |
| PALLSD             | 14.2    | M   | BCP-ALL | Diagnosis                | Not available                                               | JAK2 R683G                                             | High                          | <i>IGH@-CRLF2</i>                | Y                    |
| PAKVKK             | 14.4    | M   | BCP-ALL | Diagnosis                | Not available                                               | <i>NUP214-ABL1</i>                                     | Normal                        | Not done                         | Y                    |
| PALTWS             | <18     | M   | BCP-ALL | Diagnosis                | Not available                                               | Not detected                                           | High                          | <i>IGH@-CRLF2</i>                | N                    |
| ALL-2              | 5.5     | F   | BCP-ALL | Relapse                  | Normal                                                      | FLT3 Y572S                                             | Normal                        | Not done                         | N                    |
| ALL-4              | 8.9     | M   | BCP-ALL | Diagnosis                | t(9;22)                                                     | <i>BCR-ABL1</i>                                        | Normal                        | Not done                         | N                    |
| ALL-7              | 7.4     | M   | BCP-ALL | Diagnosis                | t(17;19), <i>TCF3-HLF</i>                                   | Not detected                                           | Normal                        | Not done                         | N                    |
| ALL-11             | 3.1     | F   | BCP-ALL | Diagnosis                | del(12)(p13) del(13)(q12)                                   | Not detected                                           | Not done                      | Not done                         | N                    |
| ALL-17             | 8.11    | F   | BCP-ALL | Diagnosis                | Normal                                                      | Not detected                                           | Normal                        | Not done                         | N                    |
| ALL-19             | 16.2    | M   | BCP-ALL | Relapse                  | Normal                                                      | <i>NUP214-ABL1</i>                                     | Normal                        | Not done                         | N                    |
| ALL-50             | 10.8    | M   | BCP-ALL | Diagnosis                | Normal                                                      | Not detected                                           | Normal                        | Not done                         | N                    |
| ALL-54             | 7.3     | M   | BCP-ALL | Diagnosis                | Normal                                                      | Not detected                                           | Not done                      | Not done                         | N                    |
| ALL-55             | 14.5    | M   | BCP-ALL | Diagnosis                | t(9;22)(q34;q11.2)                                          | <i>BCR-ABL1</i>                                        | Normal                        | Not done                         | N                    |
| ALL-56             | 10      | M   | BCP-ALL | Diagnosis                | t(9;22)(q34;q11.2)                                          | <i>BCR-ABL1</i>                                        | Not done                      | Not done                         | N                    |

|        |      |   |         |           |                                    |                           |          |          |          |
|--------|------|---|---------|-----------|------------------------------------|---------------------------|----------|----------|----------|
| ALL-57 | 5.9  | F | BCP-ALL | Diagnosis | t(1;19)(q23;p13), <i>TCF3-PBX1</i> | Not detected              | Normal   | Not done | N        |
| MLL-2  | < 1  | M | BCP-ALL | Unknown   | t(4;11), <i>MLL-AFF1</i>           | Not detected              | Normal   | Not done | Not done |
| MLL-3  | < 1  | M | BCP-ALL | Unknown   | t(11;17), <i>MLL-GAS7</i>          | Not detected              | Normal   | Not done | Not done |
| MLL-5  | < 1  | M | BCP-ALL | Unknown   | t(10;11), <i>MLL-MLLT10</i>        | Not detected              | Moderate | Not done | Not done |
| MLL-6  | < 1  | M | BCP-ALL | Unknown   | t(11;19), <i>MLL-MLLT1</i>         | Not detected              | Normal   | Not done | Not done |
| MLL-7  | < 1  | M | BCP-ALL | Diagnosis | t(4;11), <i>MLL-AFF1</i>           | Not detected              | Normal   | Not done | Not done |
| MLL-8  | < 1  | F | BCP-ALL | Unknown   | t(11;19), <i>MLL-MLLT1</i>         | Not detected              | Normal   | Not done | Not done |
| MLL-14 | < 1  | F | BCP-ALL | Unknown   | t(11;19), <i>MLL-MLLT1</i>         | Not detected              | Normal   | Not done | Not done |
| ALL-8  | 12.8 | M | T-ALL   | Relapse   | Normal                             | Not detected              | Not done | Not done | Not done |
| ALL-16 | 10.2 | F | T-ALL   | Diagnosis | Normal                             | Not detected              | Not done | Not done | Not done |
| ALL-27 | 8.5  | M | T-ALL   | Diagnosis | Normal                             | Not detected              | Normal   | Not done | Not done |
| ALL-29 | 4.9  | M | T-ALL   | Diagnosis | 46,XY                              | Not detected              | Normal   | Not done | Not done |
| ALL-30 | 7.4  | M | T-ALL   | Diagnosis | Not available                      | Not detected              | Normal   | Not done | Not done |
| ALL-31 | 10.2 | M | T-ALL   | Diagnosis | del(6)(q21),del(11)(q23)           | Not detected              | Normal   | Not done | Not done |
| ALL-32 | 11.1 | M | T-ALL   | Relapse   | del(9)(q34)                        | Not detected              | Normal   | Not done | Not done |
| ALL-42 | 2.6  | M | T-ALL   | Diagnosis | Normal                             | Not detected              | Normal   | Not done | Not done |
| ALL-43 | 6.2  | M | T-ALL   | Diagnosis | Normal                             | Not detected              | Normal   | Not done | Not done |
| ETP-12 | 16   | M | ETP-ALL | Diagnosis | Not available                      | <i>SH2B3</i> SV           | Not done | Not done | Not done |
| ETP-13 | 3    | M | ETP-ALL | Diagnosis | Not available                      | Not detected              | Not done | Not done | Not done |
| ETP-14 | 14   | M | ETP-ALL | Diagnosis | Not available                      | JAK1 S703I; PTEN deletion | Not done | Not done | Not done |

<sup>1</sup> by mRNA expression; <sup>2</sup> by PCR; <sup>3</sup> as define in Harvey RC, et al. *Blood*. 2010;116(23):4874-84; Mullighan CG, et al. *Proc Natl Acad Sci USA*. 2009;106(23):9414-8; Roberts KG, et al. *N Engl J Med*. 2014;371(11):1005-15; Roberts KG, et al. *Cancer Cell*. 2012;22(2):153-66; Yeung DT, et al. *Leukemia*. 2015;29(1):230-2.

**Table S2. Single agent efficacy of birinapant against pediatric ALL PDX models *in vivo*.**

| Xenograft     | ALL subtype     | Dose<br>(mg/kg) | Median EFS |      | T-C<br>(days) | Log-rank<br>P-value | Overall<br>Response |            |
|---------------|-----------------|-----------------|------------|------|---------------|---------------------|---------------------|------------|
|               |                 |                 | Control    | Bpt  |               |                     |                     |            |
| <b>ALL-2</b>  | BCP-ALL         | 30              | 14.8       | 91.7 | 76.9          | <0.001              | <b>MCR</b>          |            |
| <b>ALL-4</b>  | BCP-ALL         | 30              | 5.3        | 5.1  | -0.2          | 0.816               | <b>PD1</b>          |            |
| <b>ALL-7</b>  | BCP-ALL         | 30              | 6.6        | 8.6  | 2             | 0.238               | <b>PD1</b>          |            |
| <b>ALL-17</b> | BCP-ALL         | 30              | 7.9        | 39   | 31.1          | <0.001              | <b>CR</b>           |            |
| <b>ALL-19</b> | BCP-ALL         | 30              | 5          | 20.6 | 15.6          | 0.001               | <b>SD</b>           |            |
| <b>ALL-50</b> | BCP-ALL         | 30              | 3.6        | 5.6  | 2             | 0.026               | <b>PD2</b>          |            |
| <b>ALL-54</b> | BCP-ALL         | 30              | 5.7        | 26   | 20.3          | <0.001              | <b>PR</b>           |            |
| <b>ALL-55</b> | BCP-ALL         | 30              | 16.5       | 25.4 | 8.9           | <0.001              | <b>PD2</b>          |            |
| <b>PALNTB</b> | BCP-ALL         | 30              | 5.7        | 28   | 22.3          | <0.001              | <b>CR</b>           |            |
| <b>ALL-10</b> | Ph-like BCP-ALL | 30              | 5.6        | 34.8 | 29.2          | <0.001              | <b>CR</b>           |            |
| <b>PAKHZT</b> | Ph-like BCP-ALL | 30              | 12.8       | 60.2 | 47.4          | <0.001              | <b>MCR</b>          |            |
| <b>PAKRSL</b> | Ph-like BCP-ALL | 30              | 5.5        | 31.6 | 26.1          | <0.001              | <b>CR</b>           |            |
| <b>PALJDL</b> | Ph-like BCP-ALL | 30              | 4.9        | 40.5 | 35.6          | <0.001              | <b>CR</b>           |            |
| <b>PALLSD</b> | Ph-like BCP-ALL | 30              | 4.9        | 29.8 | 24.9          | <0.001              | <b>CR</b>           |            |
| <b>PAMDRM</b> | Ph-like BCP-ALL | 30              | 8.5        | 73.2 | 64.7          | <0.001              | <b>MCR</b>          |            |
| <b>MLL-5</b>  | Infant MLL-ALL  | 30              | 5.8        | 14.8 | 9             | 0.001               | <b>PD2</b>          |            |
| <b>MLL-6</b>  | Infant MLL-ALL  | 30              | 5.8        | 21.2 | 15.4          | <0.001              | <b>PD2</b>          |            |
| <b>MLL-7</b>  | Infant MLL-ALL  | 30              | 5.4        | 23.1 | 17.7          | <0.001              | <b>PD2</b>          |            |
| <b>MLL-14</b> | Infant MLL-ALL  | 30              | 5.7        | 26.3 | 20.6          | <0.001              | <b>CR</b>           |            |
|               |                 |                 | 3.8        | 4.9  | 10.4          | 5.5                 | <0.001              | <b>PD2</b> |
| <b>PALLSD</b> | Ph-like BCP-ALL | 7.5             | 4.9        | 17.6 | 12.7          | <0.001              | <b>PD2</b>          |            |
|               |                 | 15              | 4.9        | 21.9 | 17            | <0.001              | <b>PR</b>           |            |
|               |                 | 3.8             | 8.5        | 33.1 | 24.6          | <0.001              | <b>CR</b>           |            |
| <b>PAMDRM</b> | Ph-like BCP-ALL | 7.5             | 8.5        | 50.9 | 42.4          | <0.001              | <b>CR</b>           |            |
|               |                 | 15              | 8.5        | 65.2 | 56.7          | <0.001              | <b>MCR</b>          |            |



**Table S3. Individual mouse responses to birinapant as per PPTP format**

| Xenograft | Animal Counts/Statistics |                 |                 |                 |                 |                    | EFS Evaluation       |                  |         | Response Evaluation |     |     |    |    |    |     | Overall Response |     |
|-----------|--------------------------|-----------------|-----------------|-----------------|-----------------|--------------------|----------------------|------------------|---------|---------------------|-----|-----|----|----|----|-----|------------------|-----|
|           | Group                    | N1 <sup>3</sup> | Nd <sup>4</sup> | No <sup>5</sup> | Na <sup>6</sup> | No.ev <sup>7</sup> | KM med. <sup>8</sup> | Log-Rank P-value | EFS T/C | PD                  | PD1 | PD2 | SD | PR | CR | MCR | Median Score     |     |
| ALL-2     | A <sup>1</sup>           | 9               | 0               | 0               | 9               | 9                  | 14.8                 |                  |         | 9                   | 0   | 0   | 0  | 0  | 0  | 0   | 0                | PD  |
|           | B <sup>2</sup>           | 8               | 0               | 0               | 8               | 8                  | 91.7                 | <0.001           | 6.2     | 0                   | 0   | 0   | 0  | 0  | 0  | 8   | 10               | MCR |
| ALL-4     | A                        | 10              | 0               | 0               | 10              | 10                 | 5.3                  |                  |         | 10                  | 0   | 0   | 0  | 0  | 0  | 0   | 0                | PD  |
|           | B                        | 9               | 0               | 0               | 9               | 9                  | 5.1                  | 0.816            | 1       | 0                   | 7   | 2   | 0  | 0  | 0  | 0   | 0                | PD1 |
| ALL-7     | A                        | 9               | 0               | 0               | 9               | 8                  | 6.6                  |                  |         | 8                   | 0   | 0   | 1  | 0  | 0  | 0   | 0                | PD  |
|           | B                        | 9               | 1               | 0               | 8               | 8                  | 8.6                  | 0.238            | 1.3     | 0                   | 6   | 2   | 0  | 0  | 0  | 0   | 0                | PD1 |
| ALL-17    | A                        | 8               | 0               | 0               | 8               | 8                  | 7.9                  |                  |         | 8                   | 0   | 0   | 0  | 0  | 0  | 0   | 0                | PD  |
|           | B                        | 8               | 0               | 0               | 8               | 8                  | 39                   | <0.001           | 4.9     | 0                   | 0   | 0   | 0  | 0  | 8  | 0   | 8                | CR  |
| ALL-19    | A                        | 8               | 0               | 1               | 7               | 7                  | 5                    |                  |         | 7                   | 0   | 0   | 0  | 0  | 0  | 0   | 0                | PD  |
|           | B                        | 8               | 0               | 1               | 7               | 7                  | 20.6                 | 0.001            | 4.1     | 0                   | 0   | 4   | 0  | 3  | 0  | 0   | 2                | PD2 |
| ALL-50    | A                        | 9               | 0               | 0               | 9               | 9                  | 3.3                  |                  |         | 9                   | 0   | 0   | 0  | 0  | 0  | 0   | 0                | PD  |
|           | B                        | 9               | 0               | 0               | 9               | 9                  | 5.6                  | 0.026            | 1.7     | 0                   | 4   | 5   | 0  | 0  | 0  | 0   | 2                | PD2 |
| ALL-54    | A                        | 8               | 0               | 0               | 8               | 8                  | 5.7                  |                  |         | 8                   | 0   | 0   | 0  | 0  | 0  | 0   | 0                | PD  |
|           | B                        | 9               | 0               | 0               | 9               | 9                  | 26                   | <0.001           | 4.5     | 0                   | 0   | 0   | 0  | 6  | 3  | 0   | 6                | PR  |
| ALL-55    | A                        | 9               | 0               | 0               | 9               | 9                  | 16.5                 |                  |         | 9                   | 0   | 0   | 0  | 0  | 0  | 0   | 0                | PD  |
|           | B                        | 9               | 0               | 0               | 9               | 9                  | 25.4                 | <0.001           | 1.5     | 0                   | 1   | 8   | 0  | 0  | 0  | 0   | 2                | PD2 |
| PALNTB    | A                        | 9               | 0               | 0               | 9               | 9                  | 5.7                  |                  |         | 9                   | 0   | 0   | 0  | 0  | 0  | 0   | 0                | PD  |
|           | B                        | 9               | 0               | 0               | 9               | 9                  | 28                   | <0.001           | 4.9     | 0                   | 0   | 0   | 0  | 1  | 8  | 0   | 8                | CR  |
| PAKHZT    | A                        | 9               | 0               | 0               | 9               | 9                  | 12.8                 |                  |         | 9                   | 0   | 0   | 0  | 0  | 0  | 0   | 0                | PD  |
|           | B                        | 9               | 0               | 0               | 9               | 9                  | 60.2                 | <0.001           | 4.7     | 0                   | 0   | 0   | 0  | 0  | 3  | 6   | 10               | MCR |
| PAKRSL    | A                        | 9               | 0               | 0               | 9               | 9                  | 5.5                  |                  |         | 9                   | 0   | 0   | 0  | 0  | 0  | 0   | 0                | PD  |
|           | B                        | 9               | 0               | 0               | 9               | 9                  | 31.6                 | <0.001           | 5.7     | 0                   | 1   | 0   | 0  | 1  | 7  | 0   | 8                | CR  |
| PAMDRM    | A                        | 7               | 0               | 0               | 7               | 7                  | 8.5                  |                  |         | 7                   | 0   | 0   | 0  | 0  | 0  | 0   | 0                | PD  |
|           | B                        | 7               | 0               | 1               | 6               | 6                  | 73.2                 | <0.001           | 8.6     | 0                   | 0   | 0   | 0  | 0  | 0  | 6   | 10               | MCR |
| PALJDL    | A                        | 9               | 0               | 0               | 9               | 9                  | 4.9                  |                  |         | 9                   | 0   | 0   | 0  | 0  | 0  | 0   | 0                | PD  |
|           | B                        | 9               | 0               | 1               | 9               | 8                  | 40.5                 | <0.001           | 8.2     | 0                   | 0   | 0   | 0  | 0  | 8  | 0   | 8                | CR  |
| ALL-10    | A                        | 9               | 0               | 0               | 9               | 9                  | 5.6                  |                  |         | 9                   | 0   | 0   | 0  | 0  | 0  | 0   | 0                | PD  |
|           | B                        | 9               | 0               | 0               | 9               | 9                  | 34.8                 | <0.001           | 6.2     | 0                   | 0   | 0   | 0  | 0  | 9  | 0   | 8                | CR  |
| PALLSD    | A                        | 8               | 0               | 0               | 8               | 8                  | 4.9                  |                  |         | 8                   | 0   | 0   | 0  | 0  | 0  | 0   | 0                | PD  |
|           | B                        | 8               | 0               | 0               | 8               | 8                  | 29.8                 | <0.001           | 6       | 0                   | 0   | 0   | 0  | 0  | 8  | 0   | 8                | CR  |
| MLL-5     | A                        | 9               | 0               | 0               | 9               | 9                  | 5.8                  |                  |         | 9                   | 0   | 0   | 0  | 0  | 0  | 0   | 0                | PD  |
|           | B                        | 9               | 0               | 0               | 9               | 9                  | 14.8                 | 0.001            | 2.5     | 0                   | 0   | 6   | 0  | 2  | 1  | 0   | 2                | PD2 |
| MLL-6     | A                        | 9               | 0               | 0               | 9               | 9                  | 5.8                  |                  |         | 9                   | 0   | 0   | 0  | 0  | 0  | 0   | 0                | PD  |
|           | B                        | 9               | 0               | 1               | 8               | 8                  | 21.2                 | <0.001           | 3.7     | 0                   | 0   | 8   | 0  | 0  | 0  | 0   | 2                | PD2 |
| MLL-7     | A                        | 8               | 0               | 0               | 8               | 8                  | 5.4                  |                  |         | 8                   | 0   | 0   | 0  | 0  | 0  | 0   | 0                | PD  |
|           | B                        | 9               | 0               | 0               | 9               | 9                  | 23.1                 | <0.001           | 4.2     | 0                   | 0   | 6   | 0  | 3  | 0  | 0   | 2                | PD2 |
| MLL-14    | A                        | 9               | 0               | 0               | 9               | 9                  | 5.7                  |                  |         | 9                   | 0   | 0   | 0  | 0  | 0  | 0   | 0                | PD  |
|           | B                        | 9               | 0               | 0               | 9               | 9                  | 26.3                 | <0.001           | 4.6     | 0                   | 0   | 0   | 0  | 2  | 7  | 0   | 8                | CR  |
| PAMDRM    | 3.8 mg/kg                | 8               | 0               | 0               | 8               | 8                  | 33.1                 | 0.00062          | 3.9     | 0                   | 0   | 0   | 0  | 1  | 7  | 0   | 8                | CR  |
|           | 7.5 mg/kg                | 7               | 0               | 0               | 7               | 7                  | 50.9                 | 0.00058          | 6       | 0                   | 0   | 0   | 0  | 0  | 7  | 0   | 8                | CR  |
|           | 15 mg/kg                 | 8               | 0               | 0               | 8               | 8                  | 65.2                 | 0.00062          | 7.6     | 0                   | 0   | 0   | 0  | 0  | 0  | 8   | 10               | MCR |
| PALLSD    | 3.8 mg/kg                | 8               | 0               | 0               | 8               | 8                  | 10.4                 | 0.00016          | 2.1     | 0                   | 0   | 8   | 0  | 0  | 0  | 0   | 2                | PD2 |
|           | 7.5 mg/kg                | 8               | 0               | 0               | 8               | 8                  | 17.6                 | 0.00016          | 3.6     | 0                   | 0   | 8   | 0  | 0  | 0  | 0   | 2                | PD2 |
|           | 15 mg/kg                 | 8               | 0               | 0               | 8               | 8                  | 21.9                 | 0.00016          | 4.4     | 0                   | 0   | 1   | 0  | 4  | 3  | 0   | 6                | PR  |

<sup>1</sup> A: Control; <sup>2</sup> B: Treated; <sup>3</sup> N1 – number in group; <sup>4</sup> Nd – number that experienced toxic deaths; <sup>5</sup> No – number of additional mice excluded; <sup>6</sup> Na – number analyzed; <sup>7</sup> Number of events. An event was defined as ≥25% hCD45 cells in the peripheral blood; <sup>8</sup> Kaplan-Meier estimate of median days to event. Time to event was estimated using interpolation.

**Table S4. *In vivo* efficacy of birinapant in combination with VXL or Enbrel against Ph-like PDXs.**

| <b>Xenograft</b> | <b>Treatment</b> | <b>EFS<br/>(Days)</b> | <b>T-C<br/>(Days)</b> | <b>P-Value<br/>(vs.Comb)</b> | <b>Median<br/>ORM</b> | <b>Therapeutic<br/>Enhancement</b> |
|------------------|------------------|-----------------------|-----------------------|------------------------------|-----------------------|------------------------------------|
| PALLSD           | VXL              | 31.8                  | 28.2                  | <i>0.0004</i>                | <b>CR</b>             | YES                                |
|                  | Bpt              | 12.8                  | 9.1                   | <i>0.0001</i>                | <b>PD2</b>            |                                    |
|                  | VXL + Bpt        | 39                    | 35.3                  | -                            | <b>CR</b>             |                                    |
| PAKHZT           | VXL              | 41.1                  | 29                    | <i>&lt;0.0001</i>            | <b>CR</b>             | YES                                |
|                  | Bpt              | 43.9                  | 31.8                  | <i>&lt;0.0001</i>            | <b>CR</b>             |                                    |
|                  | VXL + Bpt        | 53                    | 40.9                  | -                            | <b>CR</b>             |                                    |
| PAKHZT           | Enbrel           | 13.4                  | -0.1                  | 0.07                         | <b>PD1</b>            | NO                                 |
|                  | Bpt              | 49.1                  | 35.6                  | <i>0.0001</i>                | <b>CR</b>             |                                    |
|                  | Enbrel + Bpt     | 31.8                  | 18.4                  | -                            | <b>CR</b>             |                                    |

**Table S5. List of genes differentially expressed between birinapant Responders and Non-Responders**

| Gene      | p-value (R vs. NR) | Fold-Change (R vs. NR) | Fold-Change (Description) |
|-----------|--------------------|------------------------|---------------------------|
| C18ORF51  | 0.00755            | 7.54171                | R up vs NR                |
| CYB5R2    | 0.01799            | 7.29482                | R up vs NR                |
| TSPAN7    | 0.02410            | 5.04566                | R up vs NR                |
| ALOX5AP   | 0.00512            | 3.04357                | R up vs NR                |
| NPY       | 0.03950            | 2.96562                | R up vs NR                |
| BMP2      | 0.01360            | 2.9536                 | R up vs NR                |
| ARHGEF10  | 0.01327            | 2.85364                | R up vs NR                |
| UMODL1    | 0.00461            | 2.7054                 | R up vs NR                |
| RAG1      | 0.04096            | 2.62732                | R up vs NR                |
| SH2D4B    | 0.01769            | 2.52623                | R up vs NR                |
| TNFRSF1A  | 0.04875            | 2.51189                | R up vs NR                |
| ST3GAL6   | 0.00555            | 2.43217                | R up vs NR                |
| SPTA1     | 0.00742            | 2.40766                | R up vs NR                |
| LMO2      | 0.02014            | 2.33215                | R up vs NR                |
| CAV1      | 0.03048            | 2.29861                | R up vs NR                |
| HCST      | 0.03033            | 2.25507                | R up vs NR                |
| GSN       | 0.04754            | 2.23764                | R up vs NR                |
| DLL1      | 0.02507            | 2.20604                | R up vs NR                |
| AHI1      | 0.00978            | 2.16055                | R up vs NR                |
| HIST1H2BG | 0.03997            | 2.14739                | R up vs NR                |
| NOS2      | 0.00503            | 2.08822                | R up vs NR                |
| NRN1      | 0.03971            | 2.08814                | R up vs NR                |
| PTPRE     | 0.02672            | 2.03646                | R up vs NR                |
| SCML2     | 0.01500            | 2.03196                | R up vs NR                |
| RNU4ATAC  | 0.01593            | 2.01283                | R up vs NR                |
| NRIP1     | 0.03917            | 1.96564                | R up vs NR                |
| NOS2A     | 0.00320            | 1.96045                | R up vs NR                |
| OVCH2     | 0.00469            | 1.9533                 | R up vs NR                |
| SH3TC1    | 0.02078            | 1.9496                 | R up vs NR                |
| HIST1H1C  | 0.03976            | 1.94639                | R up vs NR                |
| GHR       | 0.03361            | 1.94194                | R up vs NR                |
| HIST1H2AE | 0.02020            | 1.94031                | R up vs NR                |
| FHIT      | 0.03974            | 1.93139                | R up vs NR                |
| IL12A     | 0.04626            | 1.91505                | R up vs NR                |
| CTNBL1    | 0.03991            | -1.94734               | R down vs NR              |
| METTL7B   | 0.00721            | -1.95277               | R down vs NR              |
| DNAJA4    | 0.03031            | -1.98175               | R down vs NR              |
| GPT2      | 0.02435            | -2.02713               | R down vs NR              |
| FERMT1    | 0.00776            | -2.03981               | R down vs NR              |
| HOMER2    | 0.02259            | -2.05643               | R down vs NR              |
| HOXB7     | 0.01208            | -2.06017               | R down vs NR              |
| PRICKLE1  | 0.02642            | -2.08388               | R down vs NR              |
| CBLB      | 0.00110            | -2.11724               | R down vs NR              |
| MAPK12    | 0.00032            | -2.11759               | R down vs NR              |
| CHURC1    | 0.01243            | -2.13114               | R down vs NR              |
| MAP1A     | 0.01716            | -2.14206               | R down vs NR              |
| CISH      | 0.02029            | -2.14267               | R down vs NR              |
| CLYBL     | 0.00026            | -2.14604               | R down vs NR              |
| QPRT      | 0.00043            | -2.22279               | R down vs NR              |
| WWC1      | 0.03578            | -2.26502               | R down vs NR              |
| RNF144B   | 0.02509            | -2.3242                | R down vs NR              |
| NYNRIN    | 0.04915            | -2.35449               | R down vs NR              |

|           |         |          |              |
|-----------|---------|----------|--------------|
| MTX2      | 0.03189 | -2.41959 | R down vs NR |
| NUDT14    | 0.00106 | -2.52599 | R down vs NR |
| KIAA0367  | 0.00042 | -2.56347 | R down vs NR |
| C17ORF87  | 0.02201 | -2.60313 | R down vs NR |
| TIMP2     | 0.00626 | -2.8475  | R down vs NR |
| CALD1     | 0.02196 | -2.89648 | R down vs NR |
| BNIP3     | 0.04426 | -3.30204 | R down vs NR |
| ECHDC2    | 0.04945 | -3.34277 | R down vs NR |
| ALDH1A1   | 0.04345 | -3.34296 | R down vs NR |
| SLC27A2   | 0.03033 | -3.43106 | R down vs NR |
| LOC644936 | 0.00387 | -3.54171 | R down vs NR |
| PADI4     | 0.01000 | -3.78561 | R down vs NR |
| LAMA5     | 0.02016 | -3.9566  | R down vs NR |
| LAPTM4B   | 0.02249 | -5.12922 | R down vs NR |
| C20ORF103 | 0.04087 | -7.38602 | R down vs NR |
| IGJ       | 0.00025 | -29.446  | R down vs NR |

---
